# Supplementary material for: Ultrafast “end-on”-to-“side-on” binding-mode isomerization of an iron–carbon dioxide complex
Source: Royal Society of Chemistry journal article supplement (doi:10.1039/d1cp02300d), 2021-01-01
Supplement: d1cp02300d2.pdf [file d1cp02300d2.pdf]

## Supporting information

### Ultrafast “end-on”-to-“side-on” binding-mode isomerization of an iron-carbon dioxide complex

**Steffen Straub and Peter Vöhringer**

Lehrstuhl für Molekulare Physikalische Chemie  
Institut für Physikalische und Theoretische Chemie  
Rheinische Friedrich-Wilhelms Universität  
Wegelerstraße 12, 53115 Bonn, Germany  
E-Mail: [p.voehringer@uni-bonn.de](mailto:p.voehringer@uni-bonn.de)

#### Content:

1. Kinetic traces in the  $\nu_3$ -region of carbon dioxide
2. Animation of the full spectro-temporal evolution of the purely absorptive UV/MIR-response

## 1. Kinetic traces in the $\nu_3$ -region of carbon dioxide

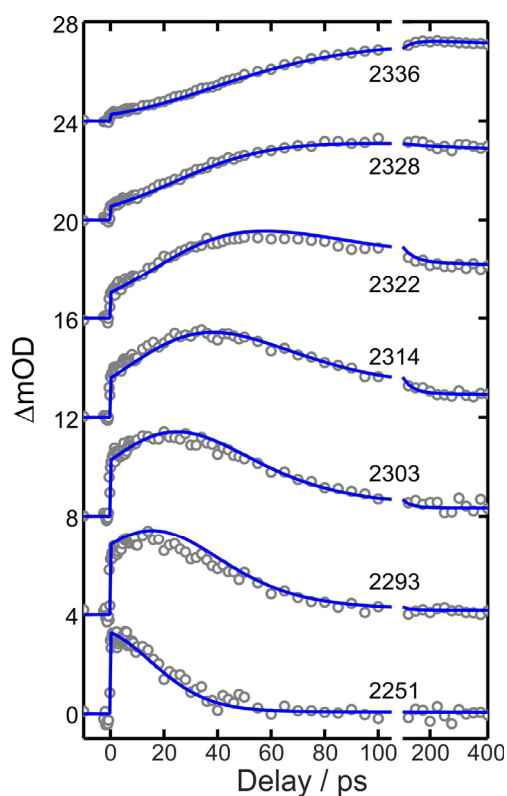

**Figure S1.** Kinetic traces recorded in the spectral region of the antisymmetric stretching mode of the carbon dioxide fragment following the 266 nm-excitation of  $[Fe(cyclam)(C_2O_4)]^+$  in liquid dimethyl sulfoxide solution at room temperature. Open symbols are the experimental data, solid curves are from the simulation using the anharmonic coupling model

## 2. Animation of the full spectro-temporal evolution of the absorptive UV/MIR-response

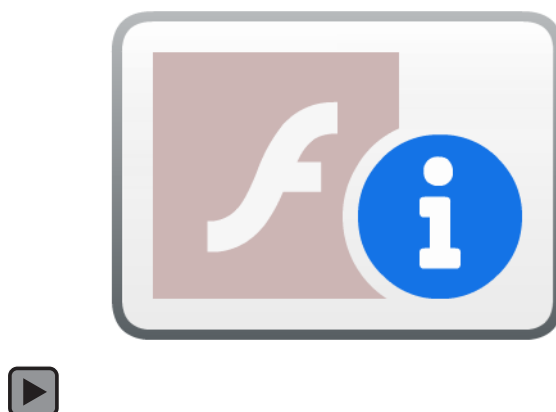

**Animation 1.** Purely absorptive UV/MIR response (Open symbols are the experimental data, blue solid curve is from the simulation). The constituent spectra from the hot ground-state, and the primary and secondary product are given by spectra shaded in blue, green, and red, respectively. **(click on the arrow to start the animation)**
